# Supplementary material
Source: Springer Nature journal article supplement (https://www.springermedizin.de/resource/supplementary/12985_2010_999_MOESM4_ESM.pdf/9608920)

**NCAM NCAM NCAM**

**Sf3b2**

**Hdac2**

**RPS13**

**Mock**

**160kDa**

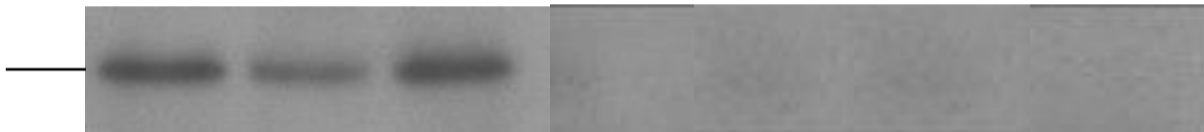

**Anti-Spike protein Ab**

Supplement: MOESM4 [file 9608920]
